# Supplementary material
Source: Research Square preprint supplement (doi:10.21203/rs.3.rs-9316064/v1)
Supplement: Supplementary file 1 [file 4808cecf671ca3678f4818e7.docx]

**Supplementary Information**

***List:***

- ***ST1*** *— Symbol definitions* and Parameterization
- ***ST2*** *--- Biological Interpretation of GMI Components Across Stages 2–4*
- ***SN1--- Baseline Numerical*** *validation of pre-threshold regimes*
- ***SN2 ---*** *Code for figure generation*
- ***SN3****— Regulatory Synergy Coefficient* (Ξ)
- ***SN4 ---*** *Internal integration flux* (Φint)
- ***SN5*** *— Genomic–Metabolic–Cytoskeletal Integration (GMI)*
- ***SN6*** *— Continuous Limit and Control-Theoretic Interpretation??*
- ***SN7*** *— Stage classification criteria*
- ***SN8*** *--- Operational Criteria for Identifying Evolutionary Transitions*
- ***SN9******---*** *Full Mathematical Derivation of Stability and Bifurcation*
- ***SN10*** **-*-*** *Nonlinear Stability Structure of the Unified Dynamical System*

*The Supplementary Notes provide formal definitions, derivations, and validation criteria that support—rather than extend—the main Results, ensuring transparency and reproducibility without overburdening the primary narrative*

**ST1 — Definitions and Biological Interpretations of Model Parameters & Symbols (Stages 1–4; Normalization)**

***Notation.*** *All state variables, indices, and multiplicative factors are normalized to [0,1] unless otherwise stated. Time τ denotes the rescaled evolutionary or integration timescale used throughout the model.*

| **Symbol** | **Conceptual role (stage applicability)** | **Definition / model role** | **Biological meaning** | **Proxy / units** | **Empirical anchor** |
| --- | --- | --- | --- | --- | --- |
| **L(τ)** | Stage-specific organizational complexity (Stages 2–4) | Core state variable representing integrated organizational complexity at stage *i* | Degree of structural, regulatory, and energetic integration | Dimensionless (normalized) | Comparative cellular / multicellular complexity indices |
| **g(τ)** | Integration-window scaling (all stages) | Time-dependent scaling of the effective integration window | Episodic forcing; effective duration of integration | Dimensionless | Environmental variability; temporal patchiness metrics |
| **Λ(τ)** | Environmental throughput (all stages) | Available energy/resource flux driving constructive dynamics | Light flux, redox gradients, nutrient supply | Normalized energy/resource flux | Chemostat fluxes; photic-zone reconstructions |
| **C(X(τ))** | Structural/architectural contribution (Stages 2–4) | Architectural complexity contribution entering the driving flux *Fi* | Membrane structure, cytoskeleton, cellular architecture | Dimensionless index | Morphological metrics; GRN module counts |
| **Cmax ​** | Normalization constant for C | Upper reference value for scaling C(X) | Empirical/theoretical maximum architecture | Same as C | Dataset maxima; literature bounds |
| **Adev(τ)** | Developmental asymmetry (Stage 4) | Developmental/morphogenetic contribution to macroscopic asymmetry | Adhesion, patterning, regional differentiation | Normalized (via Amax​) | Adhesion markers; morphology assays |
| **Amax** | Normalization constant for **Adev** | Upper reference value for developmental asymmetry | Maximal developmental investment | Same as Adev(τ) | Max observed patterning signals |
| **P(τ)** | Proliferative / positional competence (Stage 4) | Local growth capacity and resource allocation index | Cell-cycle competence; nutrient partitioning | Normalized (via Pmax ​) | Proliferation assays; metabolic complementarity |
| **Pmax** | Normalization constant for P | Upper reference value for proliferative competence | Empirical upper bound | Same as P | Dataset maxima |
| **wC, wA, wP** | Cooperation weights (Stage 4) | Exponent weights in geometric mean (wC+ wA+ wP =1) | Relative contribution of structure, adhesion, proliferation | Dimensionless | Fitted; sensitivity analysis |
| **Aeff,i(τ)** | Effective asymmetry (Stages 2–4) | Stage-specific effective polarity: Aeff,i = αiAmacro+ (1−αi)Aintra | Relevant architectural bias at stage *i* | Dimensionless | Polarity indices |
| **Aintra(τ)** | Intracellular asymmetry (Stages 2–3) | Subcellular polarity and organelle localization | Flagellar/cortical polarity | Dimensionless | Microscopy-based polarity metrics |
| **Amacro(τ)** | Macroscopic asymmetry (Stage 4) | Aggregate- or tissue-scale polarity | Body-axis and pattern formation | Dimensionless | Developmental morphology metrics |
| **αi(τ)** | Asymmetry weighting factor | Weighting between intra- and macro-asymmetry (αi ≈ 0 for Stages 2–3) | Onset of macroscopic polarity | Dimensionless | Stage assignment |
| **Φint,i(τ)** | Internal regulatory integration (Stage i) | Strength and depth of nested regulatory feedback | GRN closure; signaling feedback | Dimensionless | Motif counts; perturbation-response kinetics |
| **Ξi(τ)** | Interaction gain (Stage i) | Feedback amplification / coupling strength | Signaling cascade amplification | Dimensionless | Dose–response fits; phosphoproteomics |
| **GMI(τ)** | Generalized morphogenetic information (Stages 2–4) | Composite morphogenetic capacity: GMI=*Rcomp Rmet Rinfo  Rhomeo Rfid* | Capacity to support organized morphogenesis | Dimensionless | Composite index (see below) |
| **Rcomp(τ)** | Compartmental completeness | Stability and segregation of compartments | Membrane/organelle integrity | Dimensionless | Compartmental assays |
| **Rmet(τ)** | Metabolic integration | Coherence and throughput of metabolism | ATP stability; cofactor cycling | Dimensionless | Flux variability metrics |
| **Rinfo(τ)** | Information-processing capacity | Regulatory and repair capacity | GRN modularity; error correction | Dimensionless | Transcriptome modularity |
| **Rhomeo(τ)** | Homeostatic robustness | Ability to maintain internal steady state | pH/ion/osmotic regulation | Dimensionless | Tolerance-range assays |
| **Rfid(τ)** | Molecular fidelity | Accuracy of replication/translation | Low mutation/misincorporation rates | Dimensionless (1 = high fidelity) | Polymerase fidelity data |
| **R(τ)** | Regulatory reliability | System-level probability of correct regulation | Checkpoint reliability; control fidelity | Dimensionless | Regulatory failure rates |
| **deff,i(τ)** | Effective decay (Stage *i*) | Turnover / entropy loss reducing Li | Molecular decay; lineage loss | Per-time rate (normalized) | Degradation / loss metrics |
| ***a*multi(τ)** | Cooperative gain (Stage 4) | Developmental gating of multicellular cooperation | Strength of intercellular cooperation | Dimensionless | Adhesion/signaling cooperation |
| **Fi(τ)** | Stage-specific driving flux | Canonical form: *F*i = Λ*C(X)A*eff,iΦint,iΞiGMI | Instantaneous constructive flux | Dimensionless | Computed from components |
| **Ɫcyb** | Critical / steady-state complexity | Fixed point: ***Ɫ*cyb,i** *= Fi/deff,i* | Attractor complexity for stage *i* | Dimensionless | Inferred from dynamics |
| **q(τ)** | Adaptive update frequency | Rate of adaptive/regulatory updating | Mutation, epigenetic turnover | Normalized rate | Mutation / rewiring rates |
| **qcrit ​** | Frequency threshold | Minimum qqq sustaining constructive growth | Timescale-separation threshold | Dimensionless | Model-fitted |
| **Rs,crit** | Regulatory stability threshold | Minimum *R* for *dL/dτ* > 0 | Control-closure condition | Dimensionless | Changepoint analyses |
| **L*** | Stage complexity ceiling | Upper bound on achievable *Li* before transition | Saturation complexity | Dimensionless | Simulation / empirical bounds |

**Notes**

- All multiplicative factors are normalized prior to combination.
- Stage‑4 macroscopic asymmetry shorthand:

*Asym,4 = Aeff,4 ⋅ Adev ⋅ P ⋅ amulti*.

- For parameter estimation, multiplicative relations may be log-transformed: log*F* = k∑log *fk*
- All stages are governed by the unified dynamical system presented in Methods (Eq. 1–5). No stage-specific equation sets are introduced.

# ST2. Biological Interpretation of GMI Components Across Dynamical Regimes (Stages 2–4)

# *The following table provides illustrative biological interpretations of GMI components across dynamical regimes corresponding to Stages 2–4. These stage labels reflect stability regimes of the unified system described in ST3 rather than discrete model switching.*

| **Component** | **Stage 2 (Protocell / Early Unicell)** | **Stage 3 (Early Eukaryote / Flagellate–grade)** | **Stage 4 (Advanced Unicellular Complexity / Dinoflagellate-grade)** |
| --- | --- | --- | --- |
| **Rcomp(τ)** Structural/ Compartmental Integration | - Simple lipid membrane - Minimal internal scaffolding - No nucleus or permanent organelles | - Nucleus with nuclear envelope - Cytoskeleton (microtubules, basal bodies, flagella) - Stable organelle positioning | - Stratified cortical architecture - Complex microtubular plates / dinokaryon-like organization - Long-term structural templates enabling pattern inheritance |
| **Rmet(τ)** Metabolic Integration | - Primitive metabolism - Basic ion gradients | - Mitochondrial ATP production - Organelle metabolic coupling - Energy distribution via cytoskeleton | - Fully integrated organelle networks - Redox buffering across compartments - Metabolism linked to cortical renewal and complex morphology |
| **Rinfo(τ)** Information / Regulatory Capacity | - Simple gene or template regulation - Local chemical feedback loops | - Nuclear transcription regulation - Chromatin-level control - Organelle-to-nucleus signaling | - Multi-layer regulatory networks - Stable epigenetic and cortical information codes - Higher-order feedback loops and cellular memory |
| **Rhomeo(τ)** Homeostatic Robustness | - Basic pH and osmotic stability - Minimal stress- response capacity | - Organelle-based buffering - Cytoskeletal mechanosensing - Calcium signaling networks | - Redundant, multi-scale buffering - Dynamic stress-responsive reorganization - Structural memory stabilizing large-scale organization |
| **Rfid(τ)** Fidelity / Inheritance | - Basic genome replication - Simple binary division | - DNA checkpoints and repair - Organelle inheritance mechanisms - Cytoskeletal templates for shape and flagella | - High-fidelity chromosomal organization (dinokaryon-like) - Stable cortical and flagellar pattern inheritance - Multi-level error correction ensuring regulatory fidelity |

**SN1. Baseline numerical validation of pre-threshold regimes (Model Validation)**

These numerical simulations are provided **solely to validate the internal dynamical consistency of the reduced bioevo-cybernetic model.** They confirm that, in the absence of regulatory integration thresholds, the model produces smooth, continuous trajectories and does **not** generate spurious bifurcations or regime shifts. These simulations do **not** represent evolutionary transitions.

To establish a baseline reference, we simulated the reduced dynamical equations under parameter ranges corresponding to **Stage 1 (protocellular organization)** and **Stage 2 (stabilized unicellular organization),** both of which operate below regulatory integration thresholds by construction.

In **Stage-1 simulations**, system complexity *L*(*t*) increases monotonically in response to environmental energy throughput and primitive metabolic coupling. Regulatory reliability *R*(*t*) remains far below the critical threshold *R*s,crit​, and no bifurcation, discontinuity, or qualitative regime change is observed across the tested parameter space. System stability in this regime is maintained primarily through external coupling rather than internal regulatory closure, consistent with a pre-integrated organizational state.

In **Stage-2 simulations**, stabilized genetic inheritance and enhanced intracellular metabolic coordination increase robustness and growth efficiency while preserving continuous dynamics. Trajectories of *L*(*t*), *R*(*t*), and associated coupling variables remain smooth and differentiable, representing a controlled extension of Stage-1 behavior rather than a discrete organizational transition.

Across both stages, adaptive update frequency remains subcritical (*q*(*t*) < *q*crit), preventing the emergence of global regulatory integration or higher-order organizational layering. Together, these results demonstrate that **Stages 1 and 2 constitute continuous, pre-threshold evolutionary regimes,** characterized by optimization within stable attractors. This baseline behavior establishes a null reference against which the bifurcation-driven transitions observed in **Stages 3 and 4** can be unambiguously identified.

(Representative numerical trajectories are shown in Supplementary Figures S1 and S2.)


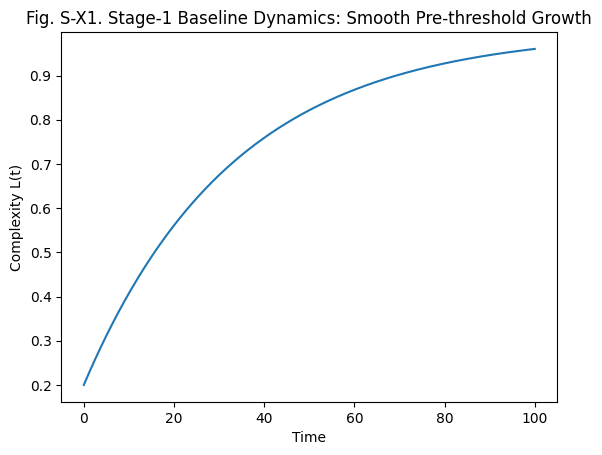


**Figure S1.** **Stage-1 baseline dynamics**

Numerical trajectory of system complexity *L*(*t*) in the Stage-1 (protocellular) regime. Complexity increases smoothly due to environmental energy coupling and primitive metabolic feedback, without bifurcation or regime shift. Regulatory reliability remains subcritical throughout, confirming that Stage-1 dynamics occupy a continuous pre-threshold attractor.


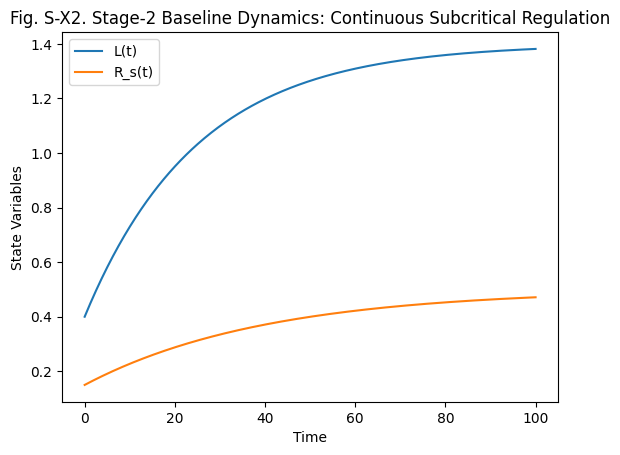


**Figure S2. Stage-2 baseline dynamics**

Numerical trajectories of system complexity *L(t*) and regulatory reliability *R​(t*) in the Stage-2 (stabilized unicellular) regime. Both variables evolve smoothly and remain below critical thresholds (*R*​< *Rs,*crit​), indicating enhanced robustness without bifurcation or irreversible organizational transition.

### SN2: ****Code for Generating Fig. 3: Imposed versus Emergent Thresholds in Evolutionary Dynamics****

This code generates Fig. 3, which **illustrates the conceptual distinction between externally imposed thresholds and emergent regulatory bifurcations.** The implementation uses a reduced, one-dimensional steady-state system designed for visualization purposes only. It does **not** represent the full bioevo-cybernetic model used elsewhere in the article.

Panel (a) shows an **externally imposed discontinuity**, where complexity changes abruptly at a predefined control value.
Panel (b) shows an **emergent saddle-node bifurcation,** arising endogenously from nonlinear regulatory feedback.
Panel (c) plots a normalized **cybernetic order-parameter proxy,** illustrating how regulatory activation increases continuously and nonlinearly across the bifurcation.

The code scans steady states of a reduced nonlinear growth–dissipation balance:

*dL / dt* = *μ* [*L*n / (*K*n + *L*n)] − *βL*,

where *μ* represents aggregated regulatory gain and nnn controls feedback depth.

### ****Cleaned and corrected code (SI-ready)****

import numpy as np

import matplotlib.pyplot as plt

# -------------------------------------------------

# Reduced illustrative model parameters

# -------------------------------------------------

beta = 1.0 # dissipation rate

K = 1.0 # half-saturation constant

n = 4 # feedback nonlinearity (depth)

# Control parameter: aggregated regulatory gain

mu = np.linspace(0, 5, 400)

# Scan for steady states

L_vals = np.linspace(0, 5, 2000)

stable_L = []

unstable_L = []

for m in mu:

f = m * (L_vals**n / (K**n + L_vals**n)) - beta * L_vals

sign_change = np.where(np.diff(np.sign(f)) != 0)[0]

roots = L_vals[sign_change]

# Heuristic classification sufficient for schematic bifurcation

if len(roots) == 1:

stable_L.append((m, roots[0]))

elif len(roots) >= 2:

stable_L.append((m, roots[0]))

unstable_L.append((m, roots[1]))

stable_L.append((m, roots[-1]))

stable_L = np.array(stable_L)

unstable_L = np.array(unstable_L)

# Normalized cybernetic activation proxy (order parameter)

def L_cyb_proxy(L):

return L**n / (K**n + L**n)

# -------------------------------------------------

# Plot

# -------------------------------------------------

fig, axes = plt.subplots(1, 3, figsize=(15, 4))

# (a) Imposed threshold (externally defined discontinuity)

axes[0].plot([0, 2, 2, 5], [0.3, 0.3, 3, 3], 'k')

axes[0].axvline(2, linestyle='--', color='gray')

axes[0].set_title("(a) Imposed threshold")

axes[0].set_xlabel("Control parameter")

axes[0].set_ylabel("Complexity L")

# (b) Emergent regulatory bifurcation

axes[1].plot(stable_L[:, 0], stable_L[:, 1], 'k', label="Stable")

if len(unstable_L) > 0:

axes[1].plot(unstable_L[:, 0], unstable_L[:, 1], 'k--', label="Unstable")

axes[1].set_title("(b) Emergent regulatory bifurcation")

axes[1].set_xlabel("Regulatory gain μ")

axes[1].set_ylabel("Steady-state complexity L*")

axes[1].legend(frameon=False)

# (c) Cybernetic order-parameter proxy

axes[2].plot(stable_L[:, 0], L_cyb_proxy(stable_L[:, 1]), 'k')

axes[2].set_title("(c) Cybernetic order parameter (proxy)")

axes[2].set_xlabel("Regulatory gain μ")

axes[2].set_ylabel("L_cyb")

plt.tight_layout()

plt.show()

**SN3. Regulatory Synergy Coefficient Ξᵢ (Stages 2–4)**

The regulatory synergy coefficient Ξ*i* quantifies the **effective gain arising from synergistic interactions among regulatory subsystems** at evolutionary Stage *i*. It captures how strongly feedback loops interact **nonlinearly** to amplify regulatory responses beyond simple additive effects. Higher Ξ*i* corresponds to stronger coordination among regulatory processes and increased stability of integrated dynamics.

**Stage 2 —** Ξ2​**: Intracellular Feedback Synergy (Minimal Integration)**

***Biological basis***

Stage 2 systems (stabilized unicellular organisms) integrate a limited set of intracellular regulatory loops, including:

- metabolic feedback regulation
- gene–metabolism coupling
- basic stress-response pathways
- simple signal transduction cascades

Conceptually:

Ξ2 ∼ *f* (metabolic feedback, basic GRN loops)

Ξ2 remains low because regulatory subsystems are largely modular, with weak cross-coupling and minimal higher-order coordination.

***Cybernetic interpretation***

Ξ2​ reflects a cell’s capacity for **self-coordination**, but without multi-layer regulatory closure or internal hierarchy.

**Stage 3 —** Ξ3**: Multi-Layer Intracellular Regulatory Synergy**

***Biological basis***

Stage 3 introduces **deep intracellular regulatory integration**, characteristic of early eukaryotic organization:

- coupling between transcriptional, post-transcriptional, and metabolic regulation
- organelle–nucleus signaling feedback
- cytoskeleton-mediated coordination of intracellular processes
- nested regulatory loops operating across multiple timescales

Conceptually:

Ξ3 ∼ *f* (organelle–nucleus signaling, multi-layer GRN coupling)

Ξ3​ is higher than Ξ2 because regulatory subsystems no longer operate independently; instead, feedback among layers stabilizes global intracellular dynamics.

***Cybernetic interpretation***

Ξ3​ measures the emergence of **integrated intracellular control**, contributing directly to increased Φint​ and reduced dependence on external stabilization.

**Stage 4 —** Ξ4**: Developmental and Morphogenetic Synergy**

***Biological basis***

Stage 4 systems exhibit developmental-scale regulatory integration, including:

- interacting morphogen gradients
- modular GRN patterning systems
- tissue-level or aggregate-level feedback
- spatially organized differentiation and positional information

Conceptually:

Ξ4 ∼ *f* (GRN–morphogen coupling, spatial feedback, pattern stability)

Ξ4​ reaches moderate-to-high values as developmental modules reinforce one another and regulatory feedback stabilizes large-scale spatial organization.

***Cybernetic interpretation***

Ξ4​ represents the formation of **stable morphogenetic attractors**, enabling persistent patterning and coordinated differentiation across spatial domains.

**Summary of Regulatory Synergy Across Stages**

| **Stage** | **Primary unit integrated** | **Interpretation of Ξ*i*** | **Typical magnitude** |
| --- | --- | --- | --- |
| 2 | Intracellular networks | Metabolic–GRN feedback synergy | Low |
| 3 | Multi-layer intracellular regulation | Organelle–GRN–cytoskeletal integration | Moderate |
| 4 | Developmental patterning systems | Morphogen–GRN–spatial feedback integration | Moderate–High |

**SN4. Internal integration flux interpretation**

The internal integration flux Φ*int* ​quantifies the rate at which regulatory activity is **internally generated, coordinated, and stabilized** within a biological system. In the bioevo-cybernetic framework, Φ*int* ​​represents the contribution of endogenous feedback processes to maintaining and increasing organizational coherence, in contrast to external environmental coupling Φ*ext*​.

Across evolutionary stages, increases in Φ*int* ​​reflect the progressive internalization of control, such that system stability depends increasingly on internal regulatory structure rather than environmental forcing.

**Stage 2 — Baseline Internal Coordination**

In Stage 2 (stabilized unicellular systems), Φ*int* ​is nonzero but limited. Internal integration arises primarily from:

- metabolic feedback loops
- basic gene–metabolism coupling
- simple stress-response regulation

These processes provide local stabilization of cellular dynamics but remain weakly coupled across regulatory layers. As a result, Φ*int*​ contributes modestly to overall system stability, and external environmental coupling remains the dominant stabilizing influence.

**Interpretation:**
Φ*int* ​​reflects minimal self-maintenance capacity, sufficient for robustness but insufficient for global regulatory closure.

**Stage 3 — Emergent Intracellular Integration**

Stage 3 is characterized by a qualitative increase in Φ*int* ​due to **multi-layer intracellular regulatory integration.** Key contributing processes include:

- feedback between transcriptional, translational, and metabolic regulation
- organelle–nucleus signaling loops
- cytoskeletal coordination of intracellular transport and signaling
- regulatory interactions operating across multiple timescales

These interactions generate reinforcing feedback among regulatory subsystems, allowing internal dynamics to stabilize without continuous environmental correction.

**Interpretation:**
The Stage-3 increase in Φ*int* ​marks the emergence of **internally integrated control,** corresponding to a shift toward internally stabilized attractors and reduced reliance on Φ*ext*​.

**Stage 4 — Developmental-Scale Integration**

In Stage 4 systems, Φ*int* ​increases further as regulatory integration extends across spatial domains and developmental processes. Contributing mechanisms include:

- coordinated gene regulatory network (GRN) patterning
- interacting morphogen gradients
- spatial feedback between differentiated regions
- stabilization of positional information through feedback

At this stage, internal integration supports persistent spatial organization and reproducible pattern formation, enabling the maintenance of complex morphologies over developmental timescales.

**Interpretation:**
High Φ*int* ​in Stage 4 reflects the dominance of **endogenous morphogenetic control,** corresponding to the formation of stable developmental attractors.

**Relation to Regulatory Synergy and Evolutionary Transitions**

Across Stages 2–4, increases in Φ*int*​ are driven by rising regulatory synergy Ξ*i​* and enhanced feedback depth. While Φ*int* ​increases continuously within stages, threshold-like transitions occur when internal integration becomes sufficient to stabilize new classes of attractors, enabling irreversible organizational change.

Thus, Φ*int* ​serves as a **diagnostic measure of internalized control,** distinguishing baseline optimization regimes from bifurcation-driven evolutionary transitions.

**Summary**

| **Stage** | **Dominant source of stability** | **Role of Φ*int*** ​**​** |
| --- | --- | --- |
| 2 | Environmental coupling | Local intracellular stabilization |
| 3 | Multi-layer intracellular feedback | Global internal control |
| 4 | Developmental-scale regulation | Stable morphogenetic organization |

# SN5 — Genomic–Metabolic–Cytoskeletal Integration (GMI)

## ****SN5.1 Definition****

The Genomic–Metabolic–Cytoskeletal Integration (GMI) term represents the degree of coordinated coupling among core intracellular subsystems:

GMI = *R*comp​⋅*R*met​⋅*R*info​⋅*R*homeo​⋅*R*fid​​

Each factor is normalized to [0,1], such that GMI reflects the effective integration efficiency of the system.

## ****SN5.2 Functional role in system dynamics****

GMI acts as a multiplicative regulator of the effective coupling strength:

*A* = Λ Φ Ξ GMI

Thus:

- Low GMI → weak amplification → subcritical regime
- High GMI → strong amplification → bistability and high-complexity states

GMI therefore directly modulates the control parameter *Rs​*.

## ****SN5.3 Biological interpretation of components****

- *R*comp​​: structural compartmentalization
- *R*met​​: metabolic throughput and energy flux
- *R*info: regulatory and genomic coordination
- *R*homeo​​: homeostatic stability
- *R*fid​​​: replication fidelity

These components jointly determine the system’s ability to sustain coherent internal organization.

## ****SN5.4 Regime-dependent behavior****

### *****Low GMI (Stage 2–like regime)*****

- Weak coupling between subsystems
- Limited internal coordination
- Dynamics dominated by dissipation

### *****Intermediate GMI (Stage 3 transition)*****

- Rapid increase in metabolic and informational coupling
- Emergence of feedback loops
- System approaches critical threshold

### *****High GMI (Stage 4–like regime)*****

- Strong integration across subsystems
- Stable high-complexity attractor
- Robust regulatory control

## ****SN5.5 Relation to evolutionary transitions****

Changes in GMI provide a mechanistic pathway for evolutionary transitions:

- Gradual increases in subsystem coupling
- Nonlinear amplification via feedback
- Threshold crossing via bifurcation (see SN9)

Thus, evolutionary innovation is not modeled as discrete jumps but as emergent transitions in system-level integration.

**SN6. Continuous Limit and Control-Theoretic Interpretation**

**1. Continuous-time formulation**

The governing dynamics are defined in the main text as a continuous-time nonlinear system. This section clarifies how such a formulation arises from a discrete-time representation and establishes its interpretation in control-theoretic terms.

Consider a generic incremental update of organizational complexity over a small interval Δt:

*Li(t+Δt) − Li(t) = ∫tt+Δt* *Ri*(*t*)dτ

where *Ri*(*t*) denotes the net rate of change resulting from the balance of constructive and dissipative processes. Here *Ri​*(*t*) corresponds to the right-hand side of the governing equation defined in the Model (Eqs. 1–4).

Taking the limit Δ*t* → 0 yields the continuous-time representation:

*dLi/dt* = *Ri*(*t*)

This expression is **purely structural** and does not redefine or replicate the functional form already specified in the Model (Eqs. 1–4).

**2. Control-theoretic interpretation**

The continuous formulation can be interpreted as a nonlinear feedback control system, in which:

- State variable:
  *Li*(*t*), representing system-level organizational complexity
- Implicit feedback structure:
  The governing equations (Eqs. 1–4) define a state-dependent reinforcement mechanism, whereby the rate of change depends nonlinearly on *Li*(*t*) through internal coupling and regulatory integration
- Effective damping:
  The same equations incorporate processes that counterbalance growth, including energetic cost, instability, and environmental turnover

Thus, the system operates as a closed-loop dynamical system, with no need to introduce additional gain–loss variables.

**3. Stability in control terms**

A steady state *Li** is defined by:

*Ri*(*Li**) = 0

Stability depends on the local response to the system:

- If perturbations around *Li** decay over time → stable attractor
- If perturbations grow → the state is unstable

In control-theoretic terms, this corresponds to the balance between effective positive feedback (reinforcement) and effective negative feedback (damping) already encoded in the governing equations.

**4. Evolutionary transitions as stability shifts**

Within this framework, evolutionary transitions correspond to:

- qualitative changes in the number or stability of steady states
- shifts in dominance between reinforcing and damping components
- emergence of new attractors in the dynamical system

Importantly, these transitions arise endogenously from the system dynamics, without discrete switching or externally imposed thresholds.

**5. Conceptual role within the framework**

This section provides:

- A continuous-limit justification for the model formulation
- A control-theoretic interpretation of regulatory dynamics
- A bridge between formal equations (Model, Methods) and biological interpretation

Crucially, it introduces no additional variables, parameters, or equations, ensuring full consistency with the main text.

**SN7. Stage Classification Criteria**

### ****1. Conceptual Overview****

- In this framework, **“Stage” = level of regulatory integration**, not morphology, and is therefore defined dynamically rather than taxonomically.
- Morphological labels (unicellular vs multicellular) are **illustrative**, not definitional.
- Example: A unicellular lineage (e.g., flagellate → dinoflagellate) can reach **Stage 3** if its **regulatory architecture** achieves Stage-3–type integration, **without forming a multicellular body.**

**Stage definitions (regulatory focus)**

| **Stage** | **Regulatory Characterization** | **Biological Illustration** |
| --- | --- | --- |
| 2 | Intracellular regulation dominates | Protocells, simple unicells |
| 3 | Emergence of distributed, multi-module regulatory networks | Flagellate → dinoflagellate |
| 4 | Developmental, tissue-like integration | Early multicellularity / complex unicell |

### ****2. Stage 3 Clarification****

- Stage 3 represents **coordination among modules**, not necessarily among multiple cells.
- **Modules** may include:
  - Internal organelles
  - Endosymbionts
  - Membrane-signaling sectors
  - Cytoskeletal domains
  - Flagellar/ciliary substructures
  - Intracellular feedback circuits
- **Key idea:** Multi-module regulatory synergy can occur **within a single cell**, producing Stage-3–like integration.

**Stage 3 examples in dinoflagellates:**

- **Ξ₃ = *f*(nuclear–cytoplasmic integration, organelle regulatory coupling, endomembrane coordination)**
- “Micro-multicellularity” within a single cell: regulatory coordination mimics early multicellular signaling.

**Features:**

1. **Complex endosymbiotic origins**
   - Multiple plastid acquisitions/replacements
   - Requires integration of foreign and native regulatory systems
2. **Extreme nuclear reorganization**
   - Dinokaryon: permanently condensed chromosomes
   - Transcriptional control via amplified tandem repeats
   - Large regulatory jump relative to simple flagellates
3. **Multi-compartment coordination**
   - Coordination among nucleus, mitochondria, chloroplasts, flagella, cortical alveoli, and membrane-signaling domains
4. **Cell-cycle–signaling integration**
   - Synchronized metabolic and signaling cycles
   - Analogous to cell–cell coordination, but within one super-complex cell

**SN8 — Operational Criteria for Identifying Evolutionary Transitions**

### ****1. Purpose and scope****

This section defines the **operational criteria used to classify evolutionary regimes (Stages 2–4)** in simulations and conceptual mapping.

Unlike SN9, which provides the **formal mathematical conditions,** this note focuses on:

- measurable indicators
- biologically interpretable thresholds
- regime identification in practice

### ****2. Effective regulatory strength****

System behavior is governed by an **effective regulatory strength** (denoted generically here as *R*eff​​), which aggregates:

- internal feedback integration
- coupling between subsystems or modules
- asymmetry-driven functional differentiation

Rather than specifying a single formula, *R*eff​ is evaluated through the composite parameters defined in ST2.

### ****3. Regime classification criteria****

Evolutionary regimes are identified operationally based on system behavior:

#### ****(a) Subcritical regime (pre-transition)****

- Single stable low-complexity state
- Weak or transient regulatory reinforcement
- High sensitivity to dissipation

**Biological analogues:**
prokaryotic systems, unstable proto-symbioses

#### ****(b) Near-critical regime (transition zone)****

- Increased sensitivity to parameter variation
- Slowed dynamics near quasi-stable states
- Fluctuations between organizational configurations

**Interpretation:**
system approaches a dynamical threshold but has not stabilized a new regime

#### ****(c) Supercritical regime (post-transition)****

- Emergence of stable high-complexity state
- Persistent regulatory integration
- Robustness to perturbations

**Biological analogues:**
eukaryotic organization, stable endosymbiosis, early multicellularity

### ****4. Coupling-driven integration****

A key operational indicator of transition is the **strength of coupling between subsystems**:

- Weak coupling → independent or loosely interacting modules
- Strong coupling → coordinated, co-dependent subsystems

In simulations, transitions are identified when increases in coupling produce:

- sustained increases in *L*(*t*)
- stabilization of higher-complexity states
- reduced sensitivity to perturbations

### ****5. Developmental accessibility (Stage 4 context)****

For multicellular regimes, an additional operational criterion is **developmental accessibility**:

- When regulatory coordination supports stable differentiation and patterning → multicellular regime is accessible
- When coordination is insufficient → system reverts to lower-level organization

This criterion is evaluated behaviorally (via system trajectories), not through imposed switches.

### ****6. Practical identification in simulations****

In numerical analysis, regime transitions are detected using:

- long-term behavior of *L*(*t*) (convergence vs. collapse)
- sensitivity to parameter perturbation
- persistence of high-complexity attractors

These diagnostics provide a **practical mapping from continuous dynamics to discrete evolutionary stages,** without introducing discontinuities into the model itself.

### ****7. Relationship to SN9****

- **SN8 (this section):**
  → What transitions look like (operational, biological, simulation-based)
- **SN9:**
  → Why transitions occur (mathematical conditions, bifurcation theory)

This separation ensures:

- no duplication
- clear reviewer logic
- strong theory–application linkage

**SN9. Full Mathematical Derivation of Stability and Bifurcation Conditions**

**SN9.1 Reduced dynamical system**

The system is governed by the nonlinear dynamical equation:

*dL/dt = F*(*L*) *=* Λ Φ Ξ GMI [*L*n/(*Kn+L*n)] *− dL*

Define the effective coupling parameter:

*A* = Λ Φ Ξ GMI

Thus:

*dL/dt = A*(*t*) [*L*n/(*Kn+L*n)] *− d*(*t*)*L* (SN9.1)

For stability analysis, we assume a quasi-static regime:

*A*(*t*) *→ A* > 0, *d*(*t*) *→ d* > 0

yielding an autonomous system.

**SN9.2 Fixed points**

Steady states *L** satisfy:

*A* [(*L**)n/(*K*n+(*L**)n)] = *d L** (SN9.2)

Rearranging:

*A*(*L**)n = *dL**[*K*n + (*L**)n]

*A*(*L**)n = *dK*n*L**+ *d*(*L**)n+1

Dividing by *L** > 0:

*A*(*L**)n−1 = *dK*n + *d*(*L**)n (SN9.3)

**SN9.3 Existence of equilibria**

- Trivial solution:

*L**= 0

- Nontrivial equilibria are determined by Eq. (SN9.3)

Depending on parameters:

- One solution → monostability
- Three solutions → bistability (two stable + one unstable)

**SN9.4 Linear stability analysis**

Define:

*F*(*L*) = *A* [*L*n/(*K*n+*L*n)] − *dL*

Derivative of the Hill function:

​[*L*n/(*K*n+*L*n​)] *d/dL* = [n*L*n−1(*K*n+*L*n) − *L*n(n*L*n−1)​] /(*K*n+*L*n)2 = (n*K*n*L*n−1 /(*K*n+*L*n)2 ​

Thus the Jacobian:

*J*(*L*) = *dF/dL* = *A* [n*K*n*L*n−1/(*K*n+*L*n)2]– *d* (SN9.4)

**SN9.5 Stability condition**

A fixed point *L** is:

- **Stable** if *J*(*L**) < 0
- **Unstable** if *J*(*L**) > 0

Thus, stability depends on the balance:

*A*[n*K*n(*L**)n−1] / [*Kn+*(*L**)n)2] vs. *d*

This expresses the balance between:

- nonlinear regulatory amplification
- linear dissipation

**SN9.6 Saddle-node bifurcation condition**

A saddle-node bifurcation occurs when:

*F*(*L**) = 0*, J*(*L**) = 0

From stability condition:

*A*[n*K*n(*L**)n−1] */* [*Kn+*(*L**)n)2] = *d* (SN9.5)

From fixed point condition:

*d* = *A* {(*L**)n / [L*(Kn+(L*)n)]} = *A*{[(*L**)n−1] / [*Kn+*(*L**)n]}

Substitute into (SN9.5):

*A*[n*K*n(*L**)n−1] */* [*Kn+*(*L**)n)2] = *A*[(*L**)n−1] / [*Kn+*(*L**)n]

Cancel common terms:

n*K*n/ (*K*n+(*L**)n = 1

Thus:

*K*n + (*L**)n = n*K*n

(*L**)n = (n−1)*K*n

*L** = *K*(n−1)1/n (SN9.6)

**SN9.7 Critical threshold condition**

Substitute Eq. (SN9.6) into Eq. (SN9.2):

After simplification:

*A/d* = [n/(n−1)]⋅[*K*/(n−1)1/n](SN9.7)

Define:

*Rs*= *A/d*

Thus:

*Rs*crit = [n/(n−1)]⋅[*K*/(n−1)1/n]

This is the explicit analytical threshold for bistability.

**SN9.8 Phase structure and regimes**

The system exhibits:

**(i) Subcritical regime**

*Rs​* < *Rs*crit ​

- Single stable equilibrium
- Dissipation-dominated

**(ii) Critical regime**

*Rs​* = *Rs*crit

- Saddle-node bifurcation
- Marginal stability

**(iii) Supercritical regime**

*Rs​* > *Rs*crit ​

- Two stable equilibria + one unstable
- Bistability and hysteresis

**SN9.9 Critical slowing down**

Near the bifurcation:

*J(L**) → 0

Relaxation time:

*τ*  ∼ 1/∣J∣

- system response slows dramatically
- provides early-warning signal of transition

**SN9.10 Non-dimensional form**

Let:

*x* = *L/K​*

Then:

*dx/dt* = *A*[*x*n/(1+*x*n)] – *dx* (SN9.8)

System behavior depends primarily on:

- nonlinearity *n*
- control ratio *Rs​* = *A/d*

**SN9.11 Interpretation**

The threshold condition depends on:

- *A*=ΛΦΞGMI: integrated regulatory coupling
- *d*: dissipation
- *K,n*: nonlinear response

Thus, evolutionary transitions emerge from:

- continuous parameter variation
- nonlinear amplification
- bifurcation-driven reorganization

# ****SN10 — Nonlinear Stability Structure of the Unified Dynamical System****

### ****SN10.1 Governing structure****

The dynamics of adaptive–organizational complexity are governed by the reduced nonlinear equation:

*dL/dt* = Λ Φ Ξ GMI *H*(*L*) − *dL*

where *H*(*L*) is a saturating Hill-type function. This formulation defines a one-dimensional nonlinear dynamical system in which growth is regulated by coupled internal processes and opposed by linear dissipation.

### ****SN10.2 Fixed-point structure****

Steady states satisfy:

Λ Φ Ξ GMI *H*(*L**) = *dL**

Depending on parameter values, the system admits:

- **Single stable equilibrium** (low-complexity regime), or
- **Three equilibria** (two stable, one unstable), corresponding to bistability

The transition between these regimes reflects a qualitative reorganization of system dynamics.

### ****SN10.3 Effective control parameter****

Define the dimensionless control ratio:

*Rs* = Λ Φ Ξ GMI / *d*

This parameter captures the balance between constructive regulatory coupling and dissipation. System behavior is primarily governed by the magnitude of *Rs*:

- *Rs* ≪ 1: dissipation-dominated regime
- *Rs* ​≈ *Rs,*crit​: threshold regime
- *Rs* ​≫ 1: integration-dominated regime

### ****SN10.4 Bifurcation structure (qualitative)****

As Rs​ increases, the system undergoes a **saddle-node bifurcation**, characterized by:

- Emergence of a pair of equilibria
- Loss of global stability of the low-complexity state
- Appearance of a high-complexity attractor

This transition defines a dynamical threshold separating qualitatively distinct organizational regimes.

### ****SN10.5 Regime interpretation****

The three dynamical regimes correspond to:

| **Regime** | **Dynamical structure** | **Biological interpretation** |
| --- | --- | --- |
| Subcritical | Single stable fixed point | Weak integration, dissipative dominance |
| Critical | Marginal stability | Transitional regime, sensitive to perturbation |
| Supercritical | Bistability or high stable state | Strong regulatory integration |

### ****SN10.6 Relation to Supplementary Note SN9****

The expressions for:

- the Jacobian,
- the bifurcation condition,
- and the critical threshold *Rs*,crit​,

are derived explicitly in **SN9**. The present note provides only a structural summary to support interpretation of simulation and analytical results.
